# Supplementary material for: Highly conserved molecular pathways, including Wnt signaling, promote functional recovery from spinal cord injury in lampreys
Source: Sci Rep. 2018 Jan 15;8:742. doi: 10.1038/s41598-017-18757-1 (PMC5768751; doi:10.1038/s41598-017-18757-1)
Supplement: Supplementary file 5 — Supplemental Table S4 [file 41598_2017_18757_MOESM5_ESM.xlsx]

## Sheet: GO Category Bundling Code
CYTOSKELETON AND MUSCLE		IMMUNE		ION		DEVELOPMENT		NEUROLOGICAL		CELL DEATH		CELL DEATH		TRANSCRIPTON/TRANSLATION		EXTRACELLULAR MATRIX		METABOLIC		OTHER
GO TERM	ID	GO TERM	ID	GO TERM	ID	GO TERM	ID	GO TERM	ID	GO TERM	ID	GO TERM	ID	GO TERM	ID	GO TERM	ID	GO TERM	ID	GO TERM	ID
actin cytoskeleton organization	GO:0030036	activation of plasma proteins involved in acute inflammatory response	GO:0002541	anion transport	GO:0006820	anatomical structure development	GO:0048856	brain development	GO:0007420	anti-apoptosis	GO:0006916	cell cycle	GO:0007049	DNA damage checkpoint	GO:0000077	cell-matrix adhesion	GO:0007160	glycosaminoglycan metabolic process	GO:0030203	activation of JUN kinase activity	GO:0007257
actin cytoskeleton reorganization	GO:0031532	adaptive immune response	GO:0002250	calcium ion homeostasis	GO:0055074	anatomical structure morphogenesis	GO:0009653	axon guidance	GO:0007411	cell structure disassembly during apoptosis	GO:0006921	cell cycle checkpoint	GO:0000075	DNA damage response, signal transduction	GO:0042770	collagen fibril organization	GO:0030199	acyl-CoA metabolic process	GO:0006637	activation of phospholipase C activity by G-protein coupled receptor protein signaling pathway coupled to IP3 second messenger	GO:0007200
actin filament organization	GO:0007015	antigen receptor-mediated signaling pathway	GO:0050851	calcium ion transport	GO:0006816	angiogenesis	GO:0001525	cell recognition	GO:0008037	induction of apoptosis by intracellular signals	GO:0008629	cell division	GO:0051301	DNA packaging	GO:0006323	extracellular matrix organization	GO:0030198	amino sugar metabolic process	GO:0006040	activation of protein kinase activity	GO:0032147
actin filament-based movement	GO:0030048	B cell differentiation	GO:0030183	calcium ion transport into cytosol	GO:0060402	brain development	GO:0007420	cognition	GO:0050890	negative regulation of apoptosis	GO:0043066	cell proliferation	GO:0008283	histone deacetylation	GO:0016575	glycosaminoglycan biosynthetic process	GO:0006024	anaphase-promoting complex-dependent proteasomal ubiquitin-dependent protein catabolic process	GO:0031145	aging	GO:0007568
actin filament-based process	GO:0030029	cellular response to oxidative stress	GO:0034599	cation transport	GO:0006812	cardiac muscle tissue morphogenesis	GO:0055008	neurological system process	GO:0050877	negative regulation of programmed cell death	GO:0043069	centrosome organization	GO:0051297	negative regulation of DNA replication	GO:0008156	glycosaminoglycan metabolic process	GO:0030203	ATP metabolic process	GO:0046034	amine biosynthetic process	GO:0009309
actin polymerization or depolymerization	GO:0008154	complement activation	GO:0006956	cellular calcium ion homeostasis	GO:0006874	cell fate determination	GO:0001709	neuropeptide signaling pathway	GO:0007218	positive regulation of caspase activity	GO:0043280	chromosome condensation	GO:0030261	negative regulation of transcription factor import into nucleus	GO:0042992			carbohydrate metabolic process	GO:0005975	amine transport	GO:0015837
cardiac muscle contraction	GO:0060048	cytoplasmic sequestering of protein	GO:0051220	cellular ion homeostasis	GO:0006873	cell growth	GO:0016049	neurotransmitter transport	GO:0006836	regulation of apoptosis	GO:0042981	chromosome organization	GO:0051276	nucleocytoplasmic transport	GO:0006913			carboxylic acid catabolic process	GO:0046395	amino acid transport	GO:0006865
cardiac muscle tissue morphogenesis	GO:0055008	defense response	GO:0006952	cellular metal ion homeostasis	GO:0006875	cell morphogenesis	GO:0000902	regulation of neuron differentiation	GO:0045664			chromosome segregation	GO:0007059	positive regulation of DNA replication	GO:0045740			catabolic process	GO:0009056	blood circulation	GO:0008015
cytoskeleton organization	GO:0007010	defense response to bacterium	GO:0042742	cytosolic calcium ion homeostasis	GO:0051480	embryonic development	GO:0009790	regulation of neurotransmitter levels	GO:0001505			cytokinesis	GO:0000910	positive regulation of transcription factor import into nucleus	GO:0042993			cellular alcohol metabolic process	GO:0006066	calcium-mediated signaling	GO:0019722
heart development	GO:0007507	hemopoiesis	GO:0030097	cytosolic calcium ion transport	GO:0060401	epidermis development	GO:0008544	nervous system development	GO:0007399			DNA damage checkpoint	GO:0000077	pyrimidine nucleotide metabolic process	GO:0006220			cellular amine metabolic process	GO:0009308	carboxylic acid transport	GO:0046942
intermediate filament cytoskeleton organization	GO:0045104	humoral immune response	GO:0006959	detection of calcium ion	GO:0005513	growth	GO:0040007	endocytosis	GO:0006897			mitosis	GO:0007067	regulation of DNA replication	GO:0006275			cellular amino acid and derivative metabolic process	GO:0006519	cell adhesion	GO:0007155
microtubule cytoskeleton organization	GO:0000226	immune response-activating cell surface receptor signaling pathway	GO:0002429	elevation of cytosolic calcium ion concentration	GO:0007204	heart development	GO:0007507	glutamate signaling pathway	GO:0007215			mitotic cell cycle checkpoint	GO:0007093	regulation of RNA splicing	GO:0043484			cellular amino acid derivative metabolic process	GO:0006575	cell communication	GO:0007154
microtubule organizing center organization	GO:0031023	immune response-regulating cell surface receptor signaling pathway	GO:0002768	metal ion homeostasis	GO:0055065	kidney development	GO:0001822	learning or memory	GO:0007611			mitotic spindle organization	GO:0007052	regulation of translation	GO:0006417			cellular amino acid metabolic process	GO:0006520	cell differentiation	GO:0030154
microtubule-based process	GO:0007017	inflammatory response	GO:0006954	potassium ion transport	GO:0006813	multicellular organismal development	GO:0007275	sensory perception	GO:0007600			negative regulation of cell proliferation	GO:0008285	RNA elongation from RNA polymerase II promoter	GO:0006368			cyclic nucleotide metabolic process	GO:0009187	cell migration	GO:0016477
muscle contraction	GO:0006936	innate immune response	GO:0045087	response to calcium ion	GO:0051592	negative regulation of transforming growth factor beta receptor signaling pathway	GO:0030512	sensory perception of smell	GO:0007608			negative regulation of epithelial cell proliferation	GO:0050680	RNA metabolic process	GO:0016070			dicarboxylic acid metabolic process	GO:0043648	cell motility	GO:0048870
muscle filament sliding	GO:0030049	integrin-mediated signaling pathway	GO:0007229	response to metal ion	GO:0010038	nervous system development	GO:0007399	sensory perception of sound	GO:0007605			negative regulation of ubiquitin-protein ligase activity during mitotic cell cycle	GO:0051436	RNA processing	GO:0006396			energy reserve metabolic process	GO:0006112	cell motion	GO:0006928
positive regulation of cytoskeleton organization	GO:0051495	leukocyte adhesion	GO:0007159	sodium ion transport	GO:0006814	odontogenesis	GO:0042476	vesicle docking	GO:0048278			positive regulation of cell cycle	GO:0045787	rRNA metabolic process	GO:0016072			fatty acid beta-oxidation	GO:0006635	cell surface receptor linked signal transduction	GO:0007166
regulation of actin cytoskeleton organization	GO:0032956	leukocyte migration	GO:0050900			organ morphogenesis	GO:0009887	vesicle docking during exocytosis	GO:0006904			positive regulation of ubiquitin-protein ligase activity during mitotic cell cycle	GO:0051437	rRNA processing	GO:0006364			fatty acid catabolic process	GO:0009062	cell-cell adhesion	GO:0016337
regulation of cytoskeleton organization	GO:0051493	mononuclear cell proliferation	GO:0032943			positive regulation of cell growth	GO:0030307					regulation of cell cycle	GO:0051726	spliceosomal snRNP biogenesis	GO:0000387			fatty acid metabolic process	GO:0006631	cell-cell junction assembly	GO:0007043
regulation of heart contraction	GO:0008016	myeloid cell differentiation	GO:0030099			regulation of growth	GO:0040008					regulation of mitotic cell cycle	GO:0007346	transcription initiation	GO:0006352			fatty acid oxidation	GO:0019395	cell-cell junction organization	GO:0045216
regulation of heart rate	GO:0002027	negative regulation of cell migration	GO:0030336			regulation of striated muscle tissue development	GO:0016202					spindle checkpoint	GO:0031577	transcription initiation from RNA polymerase II promoter	GO:0006367			fructose metabolic process	GO:0006000	cell-substrate adhesion	GO:0031589
regulation of muscle contraction	GO:0006937	negative regulation of cytokine biosynthetic process	GO:0042036			regulation of transforming growth factor beta receptor signaling pathway	GO:0017015					spindle organization	GO:0007051	translation	GO:0006412			generation of precursor metabolites and energy	GO:0006091	cellular cation homeostasis	GO:0030003
regulation of stress fiber formation	GO:0051492	negative regulation of foam cell differentiation	GO:0010745			skeletal system development	GO:0001501							translational elongation	GO:0006414			glycogen metabolic process	GO:0005977	cellular homeostasis	GO:0019725
regulation of striated muscle contraction	GO:0006942	negative regulation of immune response	GO:0050777			spliceosomal snRNP biogenesis	GO:0000387							translational initiation	GO:0006413			glycolipid metabolic process	GO:0006664	cellular response to hormone stimulus	GO:0032870
regulation of striated muscle tissue development	GO:0016202	negative regulation of macrophage differentiation	GO:0045650			tissue development	GO:0009888							tRNA modification	GO:0006400			glycosphingolipid metabolic process	GO:0006687	cellular response to reactive oxygen species	GO:0034614
smooth muscle contraction	GO:0006939	negative regulation of myeloid cell differentiation	GO:0045638			transforming growth factor beta receptor signaling pathway	GO:0007179											hormone metabolic process	GO:0042445	circadian rhythm	GO:0007623
striated muscle contraction	GO:0006941	neutrophil chemotaxis	GO:0030593			ventricular cardiac muscle morphogenesis	GO:0055010											lipid catabolic process	GO:0016042	cyclic-nucleotide-mediated signaling	GO:0019935
ventricular cardiac muscle morphogenesis	GO:0055010	positive regulation of caspase activity	GO:0043280			epithelial to mesenchymal transition	GO:0001837											membrane lipid metabolic process	GO:0006643	detection of abiotic stimulus	GO:0009582
		positive regulation of cell migration	GO:0030335			positive regulation of pathway-restricted SMAD protein phosphorylation	GO:0010862											metabolic process	GO:0008152	detection of chemical stimulus	GO:0009593
		positive regulation of chemotaxis	GO:0050921			regulation of pathway-restricted SMAD protein phosphorylation	GO:0060393											monosaccharide metabolic process	GO:0005996	detection of light stimulus involved in visual perception	GO:0050908
		positive regulation of cytokine secretion	GO:0050715															multicellular organismal metabolic process	GO:0044236	detection of stimulus	GO:0051606
		positive regulation of I-kappaB kinase/NF-kappaB cascade	GO:0043123															negative regulation of cellular protein metabolic process	GO:0032269	detection of visible light	GO:0009584
		positive regulation of immune system process	GO:0002684															nucleobase, nucleoside, nucleotide and nucleic acid metabolic process	GO:0006139	di-, tri-valent inorganic cation transport	GO:0015674
		positive regulation of interleukin-1 beta secretion	GO:0050718															nucleoside triphosphate catabolic process	GO:0009143	digestion	GO:0007586
		positive regulation of interleukin-1 secretion	GO:0050716															nucleotide metabolic process	GO:0009117	early endosome to late endosome transport	GO:0045022
		positive regulation of JUN kinase activity	GO:0043507															phosphate metabolic process	GO:0006796	endosome to lysosome transport	GO:0008333
		positive regulation of leukocyte chemotaxis	GO:0002690															phospholipid catabolic process	GO:0009395	endosome transport	GO:0016197
		positive regulation of leukocyte migration	GO:0002687															polysaccharide metabolic process	GO:0005976	enzyme linked receptor protein signaling pathway	GO:0007167
		positive regulation of MAPKKK cascade	GO:0043410															positive regulation of lipid catabolic process	GO:0050996	epithelial cell differentiation	GO:0030855
		positive regulation of nitric oxide biosynthetic process	GO:0045429															prostaglandin metabolic process	GO:0006693	establishment of localization in cell	GO:0051649
		positive regulation of positive chemotaxis	GO:0050927															proteasomal ubiquitin-dependent protein catabolic process	GO:0043161	establishment of protein localization	GO:0045184
		prostaglandin metabolic process	GO:0006693															protein catabolic process	GO:0030163	feeding behavior	GO:0007631
		regulation of blood coagulation	GO:0030193															protein metabolic process	GO:0019538	glucose transport	GO:0015758
		regulation of cell migration	GO:0030334															proteolysis involved in cellular protein catabolic process	GO:0051603	G-protein coupled receptor protein signaling pathway	GO:0007186
		regulation of I-kappaB kinase/NF-kappaB cascade	GO:0043122															pyrimidine nucleotide metabolic process	GO:0006220	G-protein signaling, coupled to cyclic nucleotide second messenger	GO:0007187
		regulation of MAPKKK cascade	GO:0043408															regulation of glycolysis	GO:0006110	homeostatic process	GO:0042592
		regulation of myeloid cell differentiation	GO:0045637															regulation of protein catabolic process	GO:0042176	homophilic cell adhesion	GO:0007156
		regulation of NF-kappaB import into nucleus	GO:0042345															RNA metabolic process	GO:0016070	icosanoid biosynthetic process	GO:0046456
		regulation of viral genome replication	GO:0045069															rRNA metabolic process	GO:0016072	intracellular protein transport	GO:0006886
		response to cytokine stimulus	GO:0034097															sphingolipid metabolic process	GO:0006665	intracellular signaling cascade	GO:0007242
		response to external stimulus	GO:0009605															sulfur metabolic process	GO:0006790	ion homeostasis	GO:0050801
		response to hypoxia	GO:0001666															ubiquitin-dependent protein catabolic process	GO:0006511	ion transport	GO:0006811
		response to reactive oxygen species	GO:0000302															xenobiotic metabolic process	GO:0006805	lipid homeostasis	GO:0055088
		response to tumor necrosis factor	GO:0034612																	localization within membrane	GO:0051668
		response to wounding	GO:0009611																	low-density lipoprotein particle remodeling	GO:0034374
		wound healing	GO:0042060																	membrane fusion	GO:0006944
																				membrane organization	GO:0016044
																				membrane protein ectodomain proteolysis	GO:0006509
																				monocarboxylic acid transport	GO:0015718
																				negative regulation of BMP signaling pathway	GO:0030514
																				negative regulation of catalytic activity	GO:0043086
																				negative regulation of cell adhesion	GO:0007162
																				negative regulation of cell differentiation	GO:0045596
																				negative regulation of cell motion	GO:0051271
																				negative regulation of endocytosis	GO:0045806
																				negative regulation of hormone secretion	GO:0046888
																				negative regulation of intracellular transport	GO:0032387
																				negative regulation of lipid storage	GO:0010888
																				negative regulation of lipid transport	GO:0032369
																				negative regulation of phosphorylation	GO:0042326
																				negative regulation of protein amino acid phosphorylation	GO:0001933
																				negative regulation of proteolysis	GO:0045861
																				negative regulation of secretion	GO:0051048
																				negative regulation of signal transduction	GO:0009968
																				negative regulation of transport	GO:0051051
																				negative regulation of ubiquitin-protein ligase activity	GO:0051444
																				nuclear import	GO:0051170
																				organelle organization	GO:0006996
																				ossification	GO:0001503
																				peptide cross-linking	GO:0018149
																				peptide hormone processing	GO:0016486
																				peptidyl-tyrosine phosphorylation	GO:0018108
																				phosphoinositide-mediated signaling	GO:0048015
																				phosphorylation	GO:0016310
																				photoreceptor cell maintenance	GO:0045494
																				phototransduction	GO:0007602
																				positive regulation of cell adhesion	GO:0045785
																				positive regulation of cell differentiation	GO:0045597
																				positive regulation of cell motion	GO:0051272
																				positive regulation of glucose import	GO:0046326
																				positive regulation of glycogen biosynthetic process	GO:0045725
																				positive regulation of hydrolase activity	GO:0051345
																				positive regulation of intracellular transport	GO:0032388
																				positive regulation of ligase activity	GO:0051351
																				positive regulation of mitosis	GO:0045840
																				positive regulation of nucleocytoplasmic transport	GO:0046824
																				positive regulation of secretion	GO:0051047
																				positive regulation of signal transduction	GO:0009967
																				positive regulation of ubiquitin-protein ligase activity	GO:0051443
																				protein amino acid glycosylation	GO:0006486
																				protein complex assembly	GO:0006461
																				protein folding	GO:0006457
																				protein homooligomerization	GO:0051260
																				protein import into nucleus	GO:0006606
																				protein import into nucleus, translocation	GO:0000060
																				protein maturation by peptide bond cleavage	GO:0051605
																				protein modification process	GO:0006464
																				protein oligomerization	GO:0051259
																				protein tetramerization	GO:0051262
																				protein transport	GO:0015031
																				proteolysis	GO:0006508
																				proton transport	GO:0015992
																				receptor-mediated endocytosis	GO:0006898
																				regulation of ATPase activity	GO:0043462
																				regulation of blood pressure	GO:0008217
																				regulation of blood vessel size	GO:0050880
																				regulation of BMP signaling pathway	GO:0030510
																				regulation of cell adhesion	GO:0030155
																				regulation of cell differentiation	GO:0045595
																				regulation of cell motion	GO:0051270
																				regulation of cell shape	GO:0008360
																				regulation of cell-cell adhesion	GO:0022407
																				regulation of cellular pH	GO:0030641
																				regulation of cholesterol transport	GO:0032374
																				regulation of endocytosis	GO:0030100
																				regulation of endopeptidase activity	GO:0052548
																				regulation of erythrocyte differentiation	GO:0045646
																				regulation of exit from mitosis	GO:0007096
																				regulation of glucose import	GO:0046324
																				regulation of G-protein coupled receptor protein signaling pathway	GO:0008277
																				regulation of inflammatory response	GO:0050727
																				regulation of JNK cascade	GO:0046328
																				regulation of membrane potential	GO:0042391
																				regulation of mitosis	GO:0007088
																				regulation of nucleocytoplasmic transport	GO:0046822
																				regulation of pH	GO:0006885
																				regulation of protein binding	GO:0043393
																				regulation of protein kinase B signaling cascade	GO:0051896
																				regulation of protein stability	GO:0031647
																				regulation of proteolysis	GO:0030162
																				regulation of Ras protein signal transduction	GO:0046578
																				regulation of signal transduction	GO:0009966
																				regulation of ubiquitin-protein ligase activity	GO:0051438
																				regulation of vasoconstriction	GO:0019229
																				regulation of vasodilation	GO:0042312
																				respiratory gaseous exchange	GO:0007585
																				response to abiotic stimulus	GO:0009628
																				response to ethanol	GO:0045471
																				response to heat	GO:0009408
																				response to light stimulus	GO:0009416
																				response to organic substance	GO:0010033
																				response to radiation	GO:0009314
																				response to temperature stimulus	GO:0009266
																				second-messenger-mediated signaling	GO:0019932
																				signal transduction	GO:0007165
																				telomere maintenance	GO:0000723
																				Term
																				transmembrane receptor protein serine/threonine kinase signaling pathway	GO:0007178
																				transport	GO:0006810
																				visual perception	GO:0007601

## Sheet: SC- Upregulated Fig. 3A
6hpi	1dpi	3dpi	1wpi	2wpi	3wpi	4wpi	5wpi	6wpi	12wpi
actin cytoskeleton organization (GO:0030036)	amine biosynthetic process (GO:0009309)	actin cytoskeleton organization (GO:0030036)	actin filament-based movement (GO:0030048)	actin cytoskeleton organization (GO:0030036)	actin filament-based movement (GO:0030048)	actin filament-based movement (GO:0030048)	adaptive immune response (GO:0002250)	anatomical structure development (GO:0048856)	actin filament-based movement (GO:0030048)
actin filament-based movement (GO:0030048)	anatomical structure development (GO:0048856)	actin filament-based process (GO:0030029)	adaptive immune response (GO:0002250)	actin filament-based movement (GO:0030048)	anatomical structure development (GO:0048856)	actin filament-based process (GO:0030029)	antigen receptor-mediated signaling pathway (GO:0050851)	anatomical structure morphogenesis (GO:0009653)	actin filament-based process (GO:0030029)
actin filament-based process (GO:0030029)	anatomical structure morphogenesis (GO:0009653)	adaptive immune response (GO:0002250)	carboxylic acid catabolic process (GO:0046395)	actin filament-based process (GO:0030029)	anatomical structure morphogenesis (GO:0009653)	anatomical structure morphogenesis (GO:0009653)	cell adhesion (GO:0007155)	anion transport (GO:0006820)	adaptive immune response (GO:0002250)
cell cycle checkpoint (GO:0000075)	axon guidance (GO:0007411)	amino acid transport (GO:0006865)	cell adhesion (GO:0007155)	aging (GO:0007568)	antigen receptor-mediated signaling pathway (GO:0050851)	angiogenesis (GO:0001525)	cell communication (GO:0007154)	carboxylic acid transport (GO:0046942)	blood circulation (GO:0008015)
cell division (GO:0051301)	blood circulation (GO:0008015)	blood circulation (GO:0008015)	cell cycle (GO:0007049)	angiogenesis (GO:0001525)	cell adhesion (GO:0007155)	carboxylic acid catabolic process (GO:0046395)	cell proliferation (GO:0008283)	cell-substrate adhesion (GO:0031589)	cell adhesion (GO:0007155)
cell motion (GO:0006928)	brain development (GO:0007420)	cell differentiation (GO:0030154)	cell cycle checkpoint (GO:0000075)	cell adhesion (GO:0007155)	cell cycle (GO:0007049)	cell differentiation (GO:0030154)	cell surface receptor linked signal transduction (GO:0007166)	cellular alcohol metabolic process (GO:0006066)	cell division (GO:0051301)
cell-matrix adhesion (GO:0007160)	calcium-mediated signaling (GO:0019722)	cell-matrix adhesion (GO:0007160)	cell differentiation (GO:0030154)	cell differentiation (GO:0030154)	cell cycle checkpoint (GO:0000075)	cell division (GO:0051301)	cell-matrix adhesion (GO:0007160)	cellular amine metabolic process (GO:0009308)	cell-cell adhesion (GO:0016337)
cellular response to oxidative stress (GO:0034599)	carboxylic acid transport (GO:0046942)	cell-substrate adhesion (GO:0031589)	cell division (GO:0051301)	cell division (GO:0051301)	cell division (GO:0051301)	cell morphogenesis (GO:0000902)	cell-substrate adhesion (GO:0031589)	cellular amino acid and derivative metabolic process (GO:0006519)	cell-matrix adhesion (GO:0007160)
cellular response to reactive oxygen species (GO:0034614)	cell communication (GO:0007154)	cytoskeleton organization (GO:0007010)	cell motion (GO:0006928)	cell migration (GO:0016477)	cell migration (GO:0016477)	cell proliferation (GO:0008283)	defense response (GO:0006952)	cellular amino acid derivative metabolic process (GO:0006575)	cell-substrate adhesion (GO:0031589)
collagen fibril organization (GO:0030199)	cell motion (GO:0006928)	cytosolic calcium ion homeostasis (GO:0051480)	cell proliferation (GO:0008283)	cell motility (GO:0048870)	cell morphogenesis (GO:0000902)	cell-matrix adhesion (GO:0007160)	enzyme linked receptor protein signaling pathway (GO:0007167)	cellular amino acid metabolic process (GO:0006520)	centrosome organization (GO:0051297)
cytokinesis (GO:0000910)	cellular amine metabolic process (GO:0009308)	establishment of protein localization (GO:0045184)	cell-matrix adhesion (GO:0007160)	cell motion (GO:0006928)	cell motility (GO:0048870)	cell-substrate adhesion (GO:0031589)	fatty acid beta-oxidation (GO:0006635)	circadian rhythm (GO:0007623)	collagen fibril organization (GO:0030199)
cytoskeleton organization (GO:0007010)	cellular amino acid and derivative metabolic process (GO:0006519)	intracellular protein transport (GO:0006886)	cell-substrate adhesion (GO:0031589)	cell proliferation (GO:0008283)	cell motion (GO:0006928)	collagen fibril organization (GO:0030199)	fatty acid catabolic process (GO:0009062)	fatty acid beta-oxidation (GO:0006635)	cytokinesis (GO:0000910)
DNA damage checkpoint (GO:0000077)	cellular amino acid derivative metabolic process (GO:0006575)	localization within membrane (GO:0051668)	cellular response to oxidative stress (GO:0034599)	cell-matrix adhesion (GO:0007160)	cell proliferation (GO:0008283)	cytokinesis (GO:0000910)	fatty acid oxidation (GO:0019395)	kidney development (GO:0001822)	energy reserve metabolic process (GO:0006112)
DNA damage response, signal transduction (GO:0042770)	cellular amino acid metabolic process (GO:0006520)	negative regulation of catalytic activity (GO:0043086)	chromosome condensation (GO:0030261)	cell-substrate adhesion (GO:0031589)	cell-substrate adhesion (GO:0031589)	epithelial cell differentiation (GO:0030855)	homophilic cell adhesion (GO:0007156)	monocarboxylic acid transport (GO:0015718)	extracellular matrix organization (GO:0030198)
extracellular matrix organization (GO:0030198)	cognition (GO:0050890)	negative regulation of endocytosis (GO:0045806)	chromosome organization (GO:0051276)	chromosome condensation (GO:0030261)	chromosome segregation (GO:0007059)	epithelial to mesenchymal transition (GO:0001837)	immune response-activating cell surface receptor signaling pathway (GO:0002429)	organ morphogenesis (GO:0009887)	integrin-mediated signaling pathway (GO:0007229)
integrin-mediated signaling pathway (GO:0007229)	cyclic nucleotide metabolic process (GO:0009187)	negative regulation of signal transduction (GO:0009968)	chromosome segregation (GO:0007059)	chromosome organization (GO:0051276)	collagen fibril organization (GO:0030199)	extracellular matrix organization (GO:0030198)	immune response-regulating cell surface receptor signaling pathway (GO:0002768)	response to ethanol (GO:0045471)	leukocyte adhesion (GO:0007159)
multicellular organismal metabolic process (GO:0044236)	embryonic development (GO:0009790)	nuclear import (GO:0051170)	cytokinesis (GO:0000910)	chromosome segregation (GO:0007059)	cytokinesis (GO:0000910)	fatty acid beta-oxidation (GO:0006635)	inflammatory response (GO:0006954)	transcription initiation (GO:0006352)	membrane protein ectodomain proteolysis (GO:0006509)
myeloid cell differentiation (GO:0030099)	energy reserve metabolic process (GO:0006112)	nucleobase, nucleoside, nucleotide and nucleic acid metabolic process (GO:0006139)	DNA packaging (GO:0006323)	collagen fibril organization (GO:0030199)	cytoskeleton organization (GO:0007010)	fatty acid catabolic process (GO:0009062)	intracellular signaling cascade (GO:0007242)	transcription initiation from RNA polymerase II promoter (GO:0006367)	microtubule organizing center organization (GO:0031023)
negative regulation of BMP signaling pathway (GO:0030514)	feeding behavior (GO:0007631)	nucleocytoplasmic transport (GO:0006913)	epithelial cell differentiation (GO:0030855)	cytokinesis (GO:0000910)	DNA packaging (GO:0006323)	fatty acid oxidation (GO:0019395)	neurotransmitter transport (GO:0006836)	visual perception (GO:0007601)	myeloid cell differentiation (GO:0030099)
negative regulation of cell adhesion (GO:0007162)	glutamate signaling pathway (GO:0007215)	nucleotide metabolic process (GO:0009117)	homophilic cell adhesion (GO:0007156)	cytoskeleton organization (GO:0007010)	epithelial to mesenchymal transition (GO:0001837)	hormone metabolic process (GO:0042445)	positive regulation of cytoskeleton organization (GO:0051495)		negative regulation of myeloid cell differentiation (GO:0045638)
negative regulation of cell differentiation (GO:0045596)	glycogen metabolic process (GO:0005977)	organelle organization (GO:0006996)	icosanoid biosynthetic process (GO:0046456)	DNA packaging (GO:0006323)	extracellular matrix organization (GO:0030198)	microtubule-based process (GO:0007017)	positive regulation of I-kappaB kinase/NF-kappaB cascade (GO:0043123)		organ morphogenesis (GO:0009887)
negative regulation of endocytosis (GO:0045806)	G-protein coupled receptor protein signaling pathway (GO:0007186)	positive regulation of I-kappaB kinase/NF-kappaB cascade (GO:0043123)	leukocyte migration (GO:0050900)	establishment of protein localization (GO:0045184)	integrin-mediated signaling pathway (GO:0007229)	muscle contraction (GO:0006936)	regulation of actin cytoskeleton organization (GO:0032956)		positive regulation of intracellular transport (GO:0032388)
negative regulation of myeloid cell differentiation (GO:0045638)	icosanoid biosynthetic process (GO:0046456)	positive regulation of positive chemotaxis (GO:0050927)	microtubule cytoskeleton organization (GO:0000226)	extracellular matrix organization (GO:0030198)	microtubule cytoskeleton organization (GO:0000226)	muscle filament sliding (GO:0030049)	regulation of cytoskeleton organization (GO:0051493)		positive regulation of nucleocytoplasmic transport (GO:0046824)
negative regulation of phosphorylation (GO:0042326)	kidney development (GO:0001822)	positive regulation of transcription factor import into nucleus (GO:0042993)	microtubule organizing center organization (GO:0031023)	homophilic cell adhesion (GO:0007156)	microtubule-based process (GO:0007017)	myeloid cell differentiation (GO:0030099)	regulation of exit from mitosis (GO:0007096)		positive regulation of transcription factor import into nucleus (GO:0042993)
negative regulation of protein amino acid phosphorylation (GO:0001933)	lipid homeostasis (GO:0055088)	protein catabolic process (GO:0030163)	microtubule-based process (GO:0007017)	integrin-mediated signaling pathway (GO:0007229)	mitosis (GO:0007067)	negative regulation of immune response (GO:0050777)	regulation of I-kappaB kinase/NF-kappaB cascade (GO:0043122)		regulation of NF-kappaB import into nucleus (GO:0042345)
negative regulation of signal transduction (GO:0009968)	multicellular organismal metabolic process (GO:0044236)	protein import into nucleus (GO:0006606)	mitosis (GO:0007067)	leukocyte migration (GO:0050900)	mitotic spindle organization (GO:0007052)	neutrophil chemotaxis (GO:0030593)	regulation of neuron differentiation (GO:0045664)		response to cytokine stimulus (GO:0034097)
negative regulation of transforming growth factor beta receptor signaling pathway (GO:0030512)	muscle contraction (GO:0006936)	protein transport (GO:0015031)	mitotic cell cycle checkpoint (GO:0007093)	microtubule-based process (GO:0007017)	myeloid cell differentiation (GO:0030099)	nucleoside triphosphate catabolic process (GO:0009143)	regulation of neurotransmitter levels (GO:0001505)		response to external stimulus (GO:0009605)
negative regulation of transport (GO:0051051)	nervous system development (GO:0007399)	proteolysis (GO:0006508)	negative regulation of cell differentiation (GO:0045596)	mitosis (GO:0007067)	negative regulation of epithelial cell proliferation (GO:0050680)	organ morphogenesis (GO:0009887)	response to external stimulus (GO:0009605)		RNA elongation from RNA polymerase II promoter (GO:0006368)
organelle organization (GO:0006996)	neurological system process (GO:0050877)	pyrimidine nucleotide metabolic process (GO:0006220)	organelle organization (GO:0006996)	negative regulation of cell motion (GO:0051271)	negative regulation of immune response (GO:0050777)	peptide hormone processing (GO:0016486)	response to wounding (GO:0009611)
positive regulation of cell adhesion (GO:0045785)	nucleotide metabolic process (GO:0009117)	regulation of actin cytoskeleton organization (GO:0032956)	phosphoinositide-mediated signaling (GO:0048015)	neutrophil chemotaxis (GO:0030593)	organelle organization (GO:0006996)	protein folding (GO:0006457)	signal transduction (GO:0007165)
positive regulation of cytoskeleton organization (GO:0051495)	organ morphogenesis (GO:0009887)	regulation of cytoskeleton organization (GO:0051493)	positive regulation of cell cycle (GO:0045787)	organelle organization (GO:0006996)	peptide hormone processing (GO:0016486)	regulation of exit from mitosis (GO:0007096)	skeletal system development (GO:0001501)
protein transport (GO:0015031)	positive regulation of cell growth (GO:0030307)	regulation of neuron differentiation (GO:0045664)	positive regulation of I-kappaB kinase/NF-kappaB cascade (GO:0043123)	phosphoinositide-mediated signaling (GO:0048015)	peptidyl-tyrosine phosphorylation (GO:0018108)	regulation of heart contraction (GO:0008016)	spindle organization (GO:0007051)
regulation of BMP signaling pathway (GO:0030510)	positive regulation of leukocyte chemotaxis (GO:0002690)	regulation of signal transduction (GO:0009966)	positive regulation of mitosis (GO:0045840)	positive regulation of cell cycle (GO:0045787)	phosphate metabolic process (GO:0006796)	regulation of mitosis (GO:0007088)
regulation of cell adhesion (GO:0030155)	regulation of blood pressure (GO:0008217)	RNA metabolic process (GO:0016070)	protein catabolic process (GO:0030163)	positive regulation of cytoskeleton organization (GO:0051495)	phosphoinositide-mediated signaling (GO:0048015)	regulation of mitotic cell cycle (GO:0007346)
regulation of cell cycle (GO:0051726)	regulation of heart contraction (GO:0008016)	RNA processing (GO:0006396)	pyrimidine nucleotide metabolic process (GO:0006220)	positive regulation of JUN kinase activity (GO:0043507)	phosphorylation (GO:0016310)	regulation of muscle contraction (GO:0006937)
regulation of cell differentiation (GO:0045595)	regulation of muscle contraction (GO:0006937)	rRNA metabolic process (GO:0016072)	regulation of actin cytoskeleton organization (GO:0032956)	positive regulation of mitosis (GO:0045840)	positive regulation of mitosis (GO:0045840)	regulation of protein kinase B signaling cascade (GO:0051896)
regulation of cell-cell adhesion (GO:0022407)	regulation of neurotransmitter levels (GO:0001505)	rRNA processing (GO:0006364)	regulation of cell cycle (GO:0051726)	protein import into nucleus, translocation (GO:0000060)	protein import into nucleus, translocation (GO:0000060)	regulation of striated muscle contraction (GO:0006942)
regulation of endocytosis (GO:0030100)	response to ethanol (GO:0045471)	spliceosomal snRNP biogenesis (GO:0000387)	regulation of cytoskeleton organization (GO:0051493)	protein transport (GO:0015031)	protein metabolic process (GO:0019538)	regulation of viral genome replication (GO:0045069)
regulation of inflammatory response (GO:0050727)	response to organic substance (GO:0010033)	translation (GO:0006412)	regulation of exit from mitosis (GO:0007096)	regulation of actin cytoskeleton organization (GO:0032956)	protein modification process (GO:0006464)	skeletal system development (GO:0001501)
regulation of mitotic cell cycle (GO:0007346)	sensory perception (GO:0007600)		regulation of heart rate (GO:0002027)	regulation of cell adhesion (GO:0030155)	regulation of actin cytoskeleton organization (GO:0032956)	spindle checkpoint (GO:0031577)
regulation of neuron differentiation (GO:0045664)	sensory perception of sound (GO:0007605)		regulation of I-kappaB kinase/NF-kappaB cascade (GO:0043122)	regulation of cell cycle (GO:0051726)	regulation of cell cycle (GO:0051726)	spindle organization (GO:0007051)
regulation of pathway-restricted SMAD protein phosphorylation (GO:0060393)	transport (GO:0006810)		regulation of mitosis (GO:0007088)	regulation of cell motion (GO:0051270)	regulation of cytoskeleton organization (GO:0051493)	striated muscle contraction (GO:0006941)
regulation of signal transduction (GO:0009966)	visual perception (GO:0007601)		regulation of mitotic cell cycle (GO:0007346)	regulation of cytoskeleton organization (GO:0051493)	regulation of exit from mitosis (GO:0007096)
regulation of stress fiber formation (GO:0051492)			regulation of neuron differentiation (GO:0045664)	regulation of exit from mitosis (GO:0007096)	regulation of mitosis (GO:0007088)
response to cytokine stimulus (GO:0034097)			regulation of neurotransmitter levels (GO:0001505)	regulation of heart contraction (GO:0008016)	regulation of mitotic cell cycle (GO:0007346)
response to reactive oxygen species (GO:0000302)			GO:0043507	regulation of JNK cascade (GO:0046328)	regulation of protein catabolic process (GO:0042176)
response to tumor necrosis factor (GO:0034612)			response to wounding (GO:0009611)	regulation of MAPKKK cascade (GO:0043408)	regulation of proteolysis (GO:0030162)
response to wounding (GO:0009611)			rRNA metabolic process (GO:0016072)	regulation of mitosis (GO:0007088)	response to tumor necrosis factor (GO:0034612)
transforming growth factor beta receptor signaling pathway (GO:0007179)			rRNA processing (GO:0006364)	regulation of mitotic cell cycle (GO:0007346)	skeletal system development (GO:0001501)
transmembrane receptor protein serine/threonine kinase signaling pathway (GO:0007178)			spindle checkpoint (GO:0031577)	regulation of muscle contraction (GO:0006937)	spindle checkpoint (GO:0031577)
wound healing (GO:0042060)			spindle organization (GO:0007051)	regulation of neuron differentiation (GO:0045664)	spindle organization (GO:0007051)
			translational elongation (GO:0006414)	regulation of neurotransmitter levels (GO:0001505)	transforming growth factor beta receptor signaling pathway (GO:0007179)
				regulation of signal transduction (GO:0009966)
				regulation of stress fiber formation (GO:0051492)
				regulation of striated muscle contraction (GO:0006942)
				response to external stimulus (GO:0009605)
				response to hypoxia (GO:0001666)
				response to wounding (GO:0009611)
				rRNA metabolic process (GO:0016072)
				rRNA processing (GO:0006364)
				spindle checkpoint (GO:0031577)
				spindle organization (GO:0007051)
				translational elongation (GO:0006414)

## Sheet: BR - Upregulated Fig. 3B
6hpi	1dpi	3dpi	1wpi	2wpi	3wpi	4wpi	5wpi	6wpi	12wpi
actin cytoskeleton organization (GO:0030036)	actin cytoskeleton organization (GO:0030036)	adaptive immune response (GO:0002250)	anaphase-promoting complex-dependent proteasomal ubiquitin-dependent protein catabolic process (GO:0031145)	anaphase-promoting complex-dependent proteasomal ubiquitin-dependent protein catabolic process (GO:0031145)	actin cytoskeleton organization (GO:0030036)	actin cytoskeleton organization (GO:0030036)	cell communication (GO:0007154)	actin cytoskeleton organization (GO:0030036)	actin cytoskeleton organization (GO:0030036)
actin filament-based process (GO:0030029)	actin filament organization (GO:0007015)	anaphase-promoting complex-dependent proteasomal ubiquitin-dependent protein catabolic process (GO:0031145)	catabolic process (GO:0009056)	catabolic process (GO:0009056)	actin filament-based process (GO:0030029)	actin filament organization (GO:0007015)	cellular response to hormone stimulus (GO:0032870)	actin cytoskeleton reorganization (GO:0031532)	actin filament organization (GO:0007015)
amine biosynthetic process (GO:0009309)	actin filament-based movement (GO:0030048)	axon guidance (GO:0007411)	cell division (GO:0051301)	cellular amino acid and derivative metabolic process (GO:0006519)	anti-apoptosis (GO:0006916)	actin filament-based movement (GO:0030048)	cytoplasmic sequestering of protein (GO:0051220)	actin filament organization (GO:0007015)	actin polymerization or depolymerization (GO:0008154)
axon guidance (GO:0007411)	actin filament-based process (GO:0030029)	cellular amino acid derivative metabolic process (GO:0006575)	cell structure disassembly during apoptosis (GO:0006921)	cellular amino acid derivative metabolic process (GO:0006575)	cardiac muscle tissue morphogenesis (GO:0055008)	actin filament-based process (GO:0030029)	glutamate signaling pathway (GO:0007215)	actin filament-based movement (GO:0030048)	fatty acid beta-oxidation (GO:0006635)
cellular amine metabolic process (GO:0009308)	activation of protein kinase activity (GO:0032147)	chromosome segregation (GO:0007059)	cell-substrate adhesion (GO:0031589)	low-density lipoprotein particle remodeling (GO:0034374)	epithelial cell differentiation (GO:0030855)	anaphase-promoting complex-dependent proteasomal ubiquitin-dependent protein catabolic process (GO:0031145)	negative regulation of transcription factor import into nucleus (GO:0042992)	actin filament-based process (GO:0030029)	localization within membrane (GO:0051668)
cellular amino acid and derivative metabolic process (GO:0006519)	anatomical structure development (GO:0048856)	microtubule cytoskeleton organization (GO:0000226)	cytokinesis (GO:0000910)	negative regulation of ubiquitin-protein ligase activity (GO:0051444)	negative regulation of apoptosis (GO:0043066)	ATP metabolic process (GO:0046034)	phospholipid catabolic process (GO:0009395)	anatomical structure development (GO:0048856)	negative regulation of endocytosis (GO:0045806)
cellular amino acid derivative metabolic process (GO:0006575)	anatomical structure morphogenesis (GO:0009653)	microtubule-based process (GO:0007017)	induction of apoptosis by intracellular signals (GO:0008629)	negative regulation of ubiquitin-protein ligase activity during mitotic cell cycle (GO:0051436)	negative regulation of cell migration (GO:0030336)	carboxylic acid catabolic process (GO:0046395)	positive regulation of cell migration (GO:0030335)	anatomical structure morphogenesis (GO:0009653)	negative regulation of proteolysis (GO:0045861)
cytoskeleton organization (GO:0007010)	cardiac muscle tissue morphogenesis (GO:0055008)	mitosis (GO:0007067)	mitosis (GO:0007067)	positive regulation of cell migration (GO:0030335)	negative regulation of cell motion (GO:0051271)	cardiac muscle contraction (GO:0060048)	positive regulation of cell motion (GO:0051272)	axon guidance (GO:0007411)	positive regulation of leukocyte chemotaxis (GO:0002690)
generation of precursor metabolites and energy (GO:0006091)	cation transport (GO:0006812)	negative regulation of cell differentiation (GO:0045596)	negative regulation of catalytic activity (GO:0043086)	positive regulation of cell motion (GO:0051272)	negative regulation of cell proliferation (GO:0008285)	cardiac muscle tissue morphogenesis (GO:0055008)	positive regulation of lipid catabolic process (GO:0050996)	cell adhesion (GO:0007155)	positive regulation of leukocyte migration (GO:0002687)
histone deacetylation (GO:0016575)	cell adhesion (GO:0007155)	negative regulation of endocytosis (GO:0045806)	negative regulation of ubiquitin-protein ligase activity (GO:0051444)	positive regulation of leukocyte chemotaxis (GO:0002690)	negative regulation of programmed cell death (GO:0043069)	catabolic process (GO:0009056)	protein complex assembly (GO:0006461)	cell communication (GO:0007154)	positive regulation of positive chemotaxis (GO:0050927)
microtubule cytoskeleton organization (GO:0000226)	cell communication (GO:0007154)	negative regulation of foam cell differentiation (GO:0010745)	negative regulation of ubiquitin-protein ligase activity during mitotic cell cycle (GO:0051436)	positive regulation of ligase activity (GO:0051351)	regulation of apoptosis (GO:0042981)	cell-substrate adhesion (GO:0031589)	protein folding (GO:0006457)	cell differentiation (GO:0030154)	protein complex assembly (GO:0006461)
microtubule-based process (GO:0007017)	cell differentiation (GO:0030154)	negative regulation of macrophage differentiation (GO:0045650)	positive regulation of cell cycle (GO:0045787)	positive regulation of ubiquitin-protein ligase activity (GO:0051443)	regulation of muscle contraction (GO:0006937)	cytoplasmic sequestering of protein (GO:0051220)	protein oligomerization (GO:0051259)	cell migration (GO:0016477)	regulation of cellular pH (GO:0030641)
mitosis (GO:0007067)	cell motility (GO:0048870)	negative regulation of myeloid cell differentiation (GO:0045638)	positive regulation of ligase activity (GO:0051351)	positive regulation of ubiquitin-protein ligase activity during mitotic cell cycle (GO:0051437)	regulation of striated muscle contraction (GO:0006942)	fatty acid beta-oxidation (GO:0006635)	signal transduction (GO:0007165)	cell motility (GO:0048870)	regulation of pH (GO:0006885)
negative regulation of cell differentiation (GO:0045596)	cell motion (GO:0006928)	negative regulation of transport (GO:0051051)	positive regulation of mitosis (GO:0045840)	proteasomal ubiquitin-dependent protein catabolic process (GO:0043161)	regulation of translation (GO:0006417)	fatty acid catabolic process (GO:0009062)		cell motion (GO:0006928)	regulation of Ras protein signal transduction (GO:0046578)
negative regulation of cellular protein metabolic process (GO:0032269)	cell surface receptor linked signal transduction (GO:0007166)	negative regulation of ubiquitin-protein ligase activity (GO:0051444)	positive regulation of ubiquitin-protein ligase activity (GO:0051443)	protein catabolic process (GO:0030163)		fatty acid metabolic process (GO:0006631)		cell surface receptor linked signal transduction (GO:0007166)
negative regulation of endocytosis (GO:0045806)	cell-matrix adhesion (GO:0007160)	negative regulation of ubiquitin-protein ligase activity during mitotic cell cycle (GO:0051436)	positive regulation of ubiquitin-protein ligase activity during mitotic cell cycle (GO:0051437)	proteolysis (GO:0006508)		fatty acid oxidation (GO:0019395)		cell-matrix adhesion (GO:0007160)
negative regulation of foam cell differentiation (GO:0010745)	cell-substrate adhesion (GO:0031589)	positive regulation of ligase activity (GO:0051351)	proteasomal ubiquitin-dependent protein catabolic process (GO:0043161)	proteolysis involved in cellular protein catabolic process (GO:0051603)		generation of precursor metabolites and energy (GO:0006091)		cell-substrate adhesion (GO:0031589)
negative regulation of macrophage differentiation (GO:0045650)	cellular response to oxidative stress (GO:0034599)	positive regulation of ubiquitin-protein ligase activity (GO:0051443)	protein catabolic process (GO:0030163)	regulation of ubiquitin-protein ligase activity (GO:0051438)		glutamate signaling pathway (GO:0007215)		collagen fibril organization (GO:0030199)
negative regulation of myeloid cell differentiation (GO:0045638)	cellular response to reactive oxygen species (GO:0034614)	positive regulation of ubiquitin-protein ligase activity during mitotic cell cycle (GO:0051437)	protein homooligomerization (GO:0051260)	skeletal system development (GO:0001501)		hormone metabolic process (GO:0042445)		cytoplasmic sequestering of protein (GO:0051220)
negative regulation of phosphorylation (GO:0042326)	collagen fibril organization (GO:0030199)	regulation of cholesterol transport (GO:0032374)	proteolysis (GO:0006508)	transcription initiation (GO:0006352)		lipid catabolic process (GO:0016042)		cytoskeleton organization (GO:0007010)
negative regulation of protein amino acid phosphorylation (GO:0001933)	cytoskeleton organization (GO:0007010)	spindle organization (GO:0007051)	proteolysis involved in cellular protein catabolic process (GO:0051603)	transcription initiation from RNA polymerase II promoter (GO:0006367)		metabolic process (GO:0008152)		defense response (GO:0006952)
negative regulation of signal transduction (GO:0009968)	enzyme linked receptor protein signaling pathway (GO:0007167)	translational elongation (GO:0006414)	regulation of exit from mitosis (GO:0007096)	tRNA modification (GO:0006400)		muscle contraction (GO:0006936)		epithelial cell differentiation (GO:0030855)
negative regulation of transforming growth factor beta receptor signaling pathway (GO:0030512)	establishment of protein localization (GO:0045184)	translational initiation (GO:0006413)	regulation of heart contraction (GO:0008016)	ubiquitin-dependent protein catabolic process (GO:0006511)		muscle filament sliding (GO:0030049)		extracellular matrix organization (GO:0030198)
negative regulation of transport (GO:0051051)	extracellular matrix organization (GO:0030198)		regulation of mitosis (GO:0007088)			negative regulation of catalytic activity (GO:0043086)		inflammatory response (GO:0006954)
positive regulation of intracellular transport (GO:0032388)	homeostatic process (GO:0042592)		regulation of muscle contraction (GO:0006937)			negative regulation of transforming growth factor beta receptor signaling pathway (GO:0030512)		integrin-mediated signaling pathway (GO:0007229)
positive regulation of signal transduction (GO:0009967)	inflammatory response (GO:0006954)		regulation of neurotransmitter levels (GO:0001505)			negative regulation of ubiquitin-protein ligase activity (GO:0051444)		intermediate filament cytoskeleton organization (GO:0045104)
regulation of cell differentiation (GO:0045595)	integrin-mediated signaling pathway (GO:0007229)		regulation of protein stability (GO:0031647)			negative regulation of ubiquitin-protein ligase activity during mitotic cell cycle (GO:0051436)		mitotic spindle organization (GO:0007052)
regulation of cell motion (GO:0051270)	intermediate filament cytoskeleton organization (GO:0045104)		regulation of ubiquitin-protein ligase activity (GO:0051438)			nucleoside triphosphate catabolic process (GO:0009143)		negative regulation of apoptosis (GO:0043066)
regulation of cell-cell adhesion (GO:0022407)	ion transport (GO:0006811)		rRNA metabolic process (GO:0016072)			positive regulation of ligase activity (GO:0051351)		negative regulation of cell differentiation (GO:0045596)
regulation of endocytosis (GO:0030100)	multicellular organismal metabolic process (GO:0044236)		rRNA processing (GO:0006364)			positive regulation of ubiquitin-protein ligase activity (GO:0051443)		negative regulation of lipid storage (GO:0010888)
regulation of G-protein coupled receptor protein signaling pathway (GO:0008277)	muscle contraction (GO:0006936)		skeletal system development (GO:0001501)			positive regulation of ubiquitin-protein ligase activity during mitotic cell cycle (GO:0051437)		negative regulation of lipid transport (GO:0032369)
regulation of I-kappaB kinase/NF-kappaB cascade (GO:0043122)	negative regulation of cell differentiation (GO:0045596)		spindle organization (GO:0007051)			proteasomal ubiquitin-dependent protein catabolic process (GO:0043161)		negative regulation of myeloid cell differentiation (GO:0045638)
regulation of neuron differentiation (GO:0045664)	negative regulation of intracellular transport (GO:0032387)		striated muscle contraction (GO:0006941)			regulation of ATPase activity (GO:0043462)		negative regulation of programmed cell death (GO:0043069)
regulation of nucleocytoplasmic transport (GO:0046822)	negative regulation of lipid transport (GO:0032369)		ubiquitin-dependent protein catabolic process (GO:0006511)			regulation of heart contraction (GO:0008016)		negative regulation of transport (GO:0051051)
regulation of pathway-restricted SMAD protein phosphorylation (GO:0060393)	negative regulation of transport (GO:0051051)					regulation of heart rate (GO:0002027)		neurotransmitter transport (GO:0006836)
regulation of signal transduction (GO:0009966)	neurotransmitter transport (GO:0006836)					regulation of muscle contraction (GO:0006937)		nucleoside triphosphate catabolic process (GO:0009143)
regulation of transforming growth factor beta receptor signaling pathway (GO:0017015)	organ morphogenesis (GO:0009887)					regulation of striated muscle contraction (GO:0006942)		organ morphogenesis (GO:0009887)
spindle organization (GO:0007051)	peptide cross-linking (GO:0018149)					regulation of ubiquitin-protein ligase activity (GO:0051438)		peptide cross-linking (GO:0018149)
vesicle docking (GO:0048278)	positive regulation of glucose import (GO:0046326)					rRNA metabolic process (GO:0016072)		positive regulation of cell differentiation (GO:0045597)
vesicle docking during exocytosis (GO:0006904)	potassium ion transport (GO:0006813)					rRNA processing (GO:0006364)		positive regulation of intracellular transport (GO:0032388)
	protein homooligomerization (GO:0051260)					striated muscle contraction (GO:0006941)		positive regulation of nucleocytoplasmic transport (GO:0046824)
	regulation of cell differentiation (GO:0045595)					translational elongation (GO:0006414)		positive regulation of transcription factor import into nucleus (GO:0042993)
	regulation of cell shape (GO:0008360)					translational initiation (GO:0006413)		protein complex assembly (GO:0006461)
	regulation of glucose import (GO:0046324)					ventricular cardiac muscle morphogenesis (GO:0055010)		protein homooligomerization (GO:0051260)
	regulation of neurotransmitter levels (GO:0001505)							regulation of cell differentiation (GO:0045595)
	response to calcium ion (GO:0051592)							regulation of neuron differentiation (GO:0045664)
	response to external stimulus (GO:0009605)							regulation of neurotransmitter levels (GO:0001505)
	response to metal ion (GO:0010038)							regulation of nucleocytoplasmic transport (GO:0046822)
	response to wounding (GO:0009611)							response to external stimulus (GO:0009605)
	signal transduction (GO:0007165)							response to temperature stimulus (GO:0009266)
	skeletal system development (GO:0001501)							response to wounding (GO:0009611)
	striated muscle contraction (GO:0006941)							skeletal system development (GO:0001501)
	transforming growth factor beta receptor signaling pathway (GO:0007179)							spindle organization (GO:0007051)
	transmembrane receptor protein serine/threonine kinase signaling pathway (GO:0007178)							transforming growth factor beta receptor signaling pathway (GO:0007179)
	transport (GO:0006810)							vesicle docking during exocytosis (GO:0006904)
	wound healing (GO:0042060)

## Sheet: SC - Downregulated Fig. 3C
6hpi	1dpi	3dpi	1wpi	2wpi	3wpi	4wpi	5wpi	6wpi	12wpi
cell recognition (GO:0008037)	actin cytoskeleton organization (GO:0030036)	activation of phospholipase C activity by G-protein coupled receptor protein signaling pathway coupled to IP3 second messenger (GO:0007200)	actin filament-based movement (GO:0030048)	actin filament-based movement (GO:0030048)	actin filament-based movement (GO:0030048)	activation of plasma proteins involved in acute inflammatory response (GO:0002541)	actin filament-based movement (GO:0030048)	actin filament-based movement (GO:0030048)	actin filament-based movement (GO:0030048)
	actin filament organization (GO:0007015)	activation of plasma proteins involved in acute inflammatory response (GO:0002541)	activation of plasma proteins involved in acute inflammatory response (GO:0002541)	activation of phospholipase C activity by G-protein coupled receptor protein signaling pathway coupled to IP3 second messenger (GO:0007200)	actin polymerization or depolymerization (GO:0008154)	cell fate determination (GO:0001709)	actin filament-based process (GO:0030029)	actin filament-based process (GO:0030029)	actin filament-based process (GO:0030029)
	actin filament-based process (GO:0030029)	anatomical structure development (GO:0048856)	anatomical structure development (GO:0048856)	activation of plasma proteins involved in acute inflammatory response (GO:0002541)	activation of plasma proteins involved in acute inflammatory response (GO:0002541)	cell surface receptor linked signal transduction (GO:0007166)	activation of plasma proteins involved in acute inflammatory response (GO:0002541)	anatomical structure morphogenesis (GO:0009653)	activation of phospholipase C activity by G-protein coupled receptor protein signaling pathway coupled to IP3 second messenger (GO:0007200)
	actin polymerization or depolymerization (GO:0008154)	carbohydrate metabolic process (GO:0005975)	anatomical structure morphogenesis (GO:0009653)	acyl-CoA metabolic process (GO:0006637)	anatomical structure development (GO:0048856)	cell-cell adhesion (GO:0016337)	aging (GO:0007568)	cardiac muscle tissue morphogenesis (GO:0055008)	amino sugar metabolic process (GO:0006040)
	amine transport (GO:0015837)	cation transport (GO:0006812)	anti-apoptosis (GO:0006916)	anatomical structure development (GO:0048856)	anatomical structure morphogenesis (GO:0009653)	cellular amine metabolic process (GO:0009308)	anatomical structure morphogenesis (GO:0009653)	cell fate determination (GO:0001709)	anatomical structure morphogenesis (GO:0009653)
	anatomical structure development (GO:0048856)	cell adhesion (GO:0007155)	carbohydrate metabolic process (GO:0005975)	anatomical structure morphogenesis (GO:0009653)	anion transport (GO:0006820)	cellular amino acid and derivative metabolic process (GO:0006519)	carbohydrate metabolic process (GO:0005975)	cell-cell adhesion (GO:0016337)	calcium ion transport into cytosol (GO:0060402)
	anatomical structure morphogenesis (GO:0009653)	cell differentiation (GO:0030154)	cardiac muscle tissue morphogenesis (GO:0055008)	anion transport (GO:0006820)	cardiac muscle contraction (GO:0060048)	cellular amino acid metabolic process (GO:0006520)	cardiac muscle tissue morphogenesis (GO:0055008)	homophilic cell adhesion (GO:0007156)	carbohydrate metabolic process (GO:0005975)
	cardiac muscle tissue morphogenesis (GO:0055008)	cell fate determination (GO:0001709)	cell adhesion (GO:0007155)	B cell differentiation (GO:0030183)	cardiac muscle tissue morphogenesis (GO:0055008)	complement activation (GO:0006956)	cell recognition (GO:0008037)	muscle contraction (GO:0006936)	cardiac muscle tissue morphogenesis (GO:0055008)
	cation transport (GO:0006812)	cell recognition (GO:0008037)	cell fate determination (GO:0001709)	carbohydrate metabolic process (GO:0005975)	cation transport (GO:0006812)	cyclic-nucleotide-mediated signaling (GO:0019935)	cell-cell junction assembly (GO:0007043)	muscle filament sliding (GO:0030049)	cation transport (GO:0006812)
	cell adhesion (GO:0007155)	cell-cell adhesion (GO:0016337)	cell-cell adhesion (GO:0016337)	cardiac muscle tissue morphogenesis (GO:0055008)	cell fate determination (GO:0001709)	G-protein coupled receptor protein signaling pathway (GO:0007186)	cell-cell junction organization (GO:0045216)	negative regulation of cell differentiation (GO:0045596)	cell adhesion (GO:0007155)
	cell morphogenesis (GO:0000902)	cellular cation homeostasis (GO:0030003)	cell-matrix adhesion (GO:0007160)	cation transport (GO:0006812)	cellular amino acid metabolic process (GO:0006520)	G-protein signaling, coupled to cyclic nucleotide second messenger (GO:0007187)	cellular amine metabolic process (GO:0009308)	negative regulation of cytokine biosynthetic process (GO:0042036)	cell fate determination (GO:0001709)
	cell motility (GO:0048870)	cellular ion homeostasis (GO:0006873)	cell-substrate adhesion (GO:0031589)	cell fate determination (GO:0001709)	cellular homeostasis (GO:0019725)	homophilic cell adhesion (GO:0007156)	cellular amino acid and derivative metabolic process (GO:0006519)	negative regulation of macrophage differentiation (GO:0045650)	cell recognition (GO:0008037)
	cell motion (GO:0006928)	collagen fibril organization (GO:0030199)	cellular amine metabolic process (GO:0009308)	cell recognition (GO:0008037)	cellular ion homeostasis (GO:0006873)	humoral immune response (GO:0006959)	cellular homeostasis (GO:0019725)	negative regulation of myeloid cell differentiation (GO:0045638)	cell-cell adhesion (GO:0016337)
	cell-cell adhesion (GO:0016337)	complement activation (GO:0006956)	cellular amino acid and derivative metabolic process (GO:0006519)	cell-cell adhesion (GO:0016337)	complement activation (GO:0006956)	innate immune response (GO:0045087)	cellular ion homeostasis (GO:0006873)	negative regulation of phosphorylation (GO:0042326)	cyclic-nucleotide-mediated signaling (GO:0019935)
	cell-matrix adhesion (GO:0007160)	endocytosis (GO:0006897)	cellular amino acid derivative metabolic process (GO:0006575)	cellular amine metabolic process (GO:0009308)	dicarboxylic acid metabolic process (GO:0043648)	membrane fusion (GO:0006944)	collagen fibril organization (GO:0030199)	positive regulation of caspase activity (GO:0043280)	cytosolic calcium ion transport (GO:0060401)
	cell-substrate adhesion (GO:0031589)	extracellular matrix organization (GO:0030198)	cellular amino acid metabolic process (GO:0006520)	cellular amino acid and derivative metabolic process (GO:0006519)	digestion (GO:0007586)	phosphoinositide-mediated signaling (GO:0048015)	complement activation (GO:0006956)	positive regulation of cytokine secretion (GO:0050715)	detection of stimulus (GO:0051606)
	cellular amino acid derivative metabolic process (GO:0006575)	glycosaminoglycan metabolic process (GO:0030203)	cellular homeostasis (GO:0019725)	cellular amino acid derivative metabolic process (GO:0006575)	endosome transport (GO:0016197)	positive regulation of caspase activity (GO:0043280)	defense response to bacterium (GO:0042742)	positive regulation of hydrolase activity (GO:0051345)	early endosome to late endosome transport (GO:0045022)
	collagen fibril organization (GO:0030199)	G-protein signaling, coupled to cyclic nucleotide second messenger (GO:0007187)	cellular ion homeostasis (GO:0006873)	cellular amino acid metabolic process (GO:0006520)	glucose transport (GO:0015758)	positive regulation of cell migration (GO:0030335)	endocytosis (GO:0006897)	positive regulation of interleukin-1 beta secretion (GO:0050718)	glucose transport (GO:0015758)
	cytoskeleton organization (GO:0007010)	homeostatic process (GO:0042592)	collagen fibril organization (GO:0030199)	cellular homeostasis (GO:0019725)	heart development (GO:0007507)	positive regulation of cell motion (GO:0051272)	epidermis development (GO:0008544)	positive regulation of interleukin-1 secretion (GO:0050716)	G-protein coupled receptor protein signaling pathway (GO:0007186)
	epidermis development (GO:0008544)	humoral immune response (GO:0006959)	complement activation (GO:0006956)	cognition (GO:0050890)	homeostatic process (GO:0042592)	positive regulation of cytokine secretion (GO:0050715)	establishment of localization in cell (GO:0051649)	positive regulation of intracellular transport (GO:0032388)	G-protein signaling, coupled to cyclic nucleotide second messenger (GO:0007187)
	epithelial cell differentiation (GO:0030855)	innate immune response (GO:0045087)	extracellular matrix organization (GO:0030198)	complement activation (GO:0006956)	humoral immune response (GO:0006959)	positive regulation of hydrolase activity (GO:0051345)	extracellular matrix organization (GO:0030198)	positive regulation of MAPKKK cascade (GO:0043410)	homeostatic process (GO:0042592)
	extracellular matrix organization (GO:0030198)	intermediate filament cytoskeleton organization (GO:0045104)	glycosaminoglycan metabolic process (GO:0030203)	cyclic-nucleotide-mediated signaling (GO:0019935)	innate immune response (GO:0045087)	positive regulation of interleukin-1 beta secretion (GO:0050718)	heart development (GO:0007507)	positive regulation of nucleocytoplasmic transport (GO:0046824)	homophilic cell adhesion (GO:0007156)
	fructose metabolic process (GO:0006000)	muscle filament sliding (GO:0030049)	heart development (GO:0007507)	detection of calcium ion (GO:0005513)	ion homeostasis (GO:0050801)	positive regulation of interleukin-1 secretion (GO:0050716)	homeostatic process (GO:0042592)	positive regulation of secretion (GO:0051047)	ion transport (GO:0006811)
	intermediate filament cytoskeleton organization (GO:0045104)	negative regulation of cell differentiation (GO:0045596)	homeostatic process (GO:0042592)	detection of stimulus (GO:0051606)	ion transport (GO:0006811)	positive regulation of intracellular transport (GO:0032388)	homophilic cell adhesion (GO:0007156)	positive regulation of transcription factor import into nucleus (GO:0042993)	monosaccharide metabolic process (GO:0005996)
	membrane organization (GO:0016044)	negative regulation of cytokine biosynthetic process (GO:0042036)	homophilic cell adhesion (GO:0007156)	endosome to lysosome transport (GO:0008333)	localization within membrane (GO:0051668)	positive regulation of nucleocytoplasmic transport (GO:0046824)	humoral immune response (GO:0006959)	protein complex assembly (GO:0006461)	muscle filament sliding (GO:0030049)
	muscle contraction (GO:0006936)	negative regulation of hormone secretion (GO:0046888)	humoral immune response (GO:0006959)	extracellular matrix organization (GO:0030198)	membrane fusion (GO:0006944)	positive regulation of transcription factor import into nucleus (GO:0042993)	innate immune response (GO:0045087)	receptor-mediated endocytosis (GO:0006898)	negative regulation of phosphorylation (GO:0042326)
	muscle filament sliding (GO:0030049)	negative regulation of phosphorylation (GO:0042326)	ion homeostasis (GO:0050801)	fatty acid metabolic process (GO:0006631)	membrane lipid metabolic process (GO:0006643)	regulation of blood vessel size (GO:0050880)	ion homeostasis (GO:0050801)	regulation of ATPase activity (GO:0043462)	negative regulation of secretion (GO:0051048)
	negative regulation of endocytosis (GO:0045806)	negative regulation of secretion (GO:0051048)	ion transport (GO:0006811)	glycosaminoglycan metabolic process (GO:0030203)	muscle contraction (GO:0006936)	regulation of heart contraction (GO:0008016)	muscle contraction (GO:0006936)	regulation of endopeptidase activity (GO:0052548)	positive regulation of cell migration (GO:0030335)
	negative regulation of intracellular transport (GO:0032387)	phosphoinositide-mediated signaling (GO:0048015)	muscle filament sliding (GO:0030049)	G-protein coupled receptor protein signaling pathway (GO:0007186)	muscle filament sliding (GO:0030049)	regulation of neurotransmitter levels (GO:0001505)	muscle filament sliding (GO:0030049)	regulation of heart contraction (GO:0008016)	positive regulation of cell motion (GO:0051272)
	negative regulation of protein amino acid phosphorylation (GO:0001933)	photoreceptor cell maintenance (GO:0045494)	negative regulation of apoptosis (GO:0043066)	G-protein signaling, coupled to cyclic nucleotide second messenger (GO:0007187)	negative regulation of cell differentiation (GO:0045596)	regulation of NF-kappaB import into nucleus (GO:0042345)	protein maturation by peptide bond cleavage (GO:0051605)	regulation of heart rate (GO:0002027)	positive regulation of cytokine secretion (GO:0050715)
	negative regulation of transport (GO:0051051)	positive regulation of cell migration (GO:0030335)	negative regulation of cell differentiation (GO:0045596)	heart development (GO:0007507)	negative regulation of macrophage differentiation (GO:0045650)	regulation of nucleocytoplasmic transport (GO:0046822)	regulation of heart contraction (GO:0008016)	regulation of muscle contraction (GO:0006937)	positive regulation of DNA replication (GO:0045740)
	neurotransmitter transport (GO:0006836)	positive regulation of cell motion (GO:0051272)	negative regulation of macrophage differentiation (GO:0045650)	homeostatic process (GO:0042592)	negative regulation of programmed cell death (GO:0043069)	response to abiotic stimulus (GO:0009628)	regulation of heart rate (GO:0002027)	regulation of NF-kappaB import into nucleus (GO:0042345)	positive regulation of glycogen biosynthetic process (GO:0045725)
	peptide cross-linking (GO:0018149)	positive regulation of immune system process (GO:0002684)	negative regulation of programmed cell death (GO:0043069)	homophilic cell adhesion (GO:0007156)	negative regulation of transport (GO:0051051)	response to heat (GO:0009408)	response to calcium ion (GO:0051592)	regulation of nucleocytoplasmic transport (GO:0046822)	positive regulation of interleukin-1 beta secretion (GO:0050718)
	positive regulation of interleukin-1 beta secretion (GO:0050718)	positive regulation of interleukin-1 beta secretion (GO:0050718)	odontogenesis (GO:0042476)	humoral immune response (GO:0006959)	positive regulation of cell migration (GO:0030335)	second-messenger-mediated signaling (GO:0019932)	striated muscle contraction (GO:0006941)	skeletal system development (GO:0001501)	positive regulation of interleukin-1 secretion (GO:0050716)
	positive regulation of interleukin-1 secretion (GO:0050716)	positive regulation of interleukin-1 secretion (GO:0050716)	organ morphogenesis (GO:0009887)	innate immune response (GO:0045087)	positive regulation of MAPKKK cascade (GO:0043410)	skeletal system development (GO:0001501)	sulfur metabolic process (GO:0006790)	sodium ion transport (GO:0006814)	positive regulation of MAPKKK cascade (GO:0043410)
	positive regulation of nucleocytoplasmic transport (GO:0046824)	positive regulation of leukocyte chemotaxis (GO:0002690)	polysaccharide metabolic process (GO:0005976)	ion transport (GO:0006811)	potassium ion transport (GO:0006813)	sulfur metabolic process (GO:0006790)	tissue development (GO:0009888)	striated muscle contraction (GO:0006941)	positive regulation of nitric oxide biosynthetic process (GO:0045429)
	positive regulation of transcription factor import into nucleus (GO:0042993)	positive regulation of leukocyte migration (GO:0002687)	positive regulation of cell migration (GO:0030335)	learning or memory (GO:0007611)	protein tetramerization (GO:0051262)	visual perception (GO:0007601)	transport (GO:0006810)	sulfur metabolic process (GO:0006790)	positive regulation of transcription factor import into nucleus (GO:0042993)
	protein complex assembly (GO:0006461)	positive regulation of secretion (GO:0051047)	positive regulation of cell motion (GO:0051272)	muscle filament sliding (GO:0030049)	regulation of blood vessel size (GO:0050880)		ventricular cardiac muscle morphogenesis (GO:0055010)	ventricular cardiac muscle morphogenesis (GO:0055010)	potassium ion transport (GO:0006813)
	protein homooligomerization (GO:0051260)	protein amino acid glycosylation (GO:0006486)	positive regulation of immune system process (GO:0002684)	negative regulation of cell differentiation (GO:0045596)	regulation of heart contraction (GO:0008016)		visual perception (GO:0007601)		proton transport (GO:0015992)
	regulation of ATPase activity (GO:0043462)	protein maturation by peptide bond cleavage (GO:0051605)	positive regulation of leukocyte chemotaxis (GO:0002690)	negative regulation of macrophage differentiation (GO:0045650)	regulation of heart rate (GO:0002027)				receptor-mediated endocytosis (GO:0006898)
	regulation of cytoskeleton organization (GO:0051493)	regulation of cell differentiation (GO:0045595)	positive regulation of leukocyte migration (GO:0002687)	negative regulation of myeloid cell differentiation (GO:0045638)	regulation of muscle contraction (GO:0006937)				regulation of cell differentiation (GO:0045595)
	regulation of I-kappaB kinase/NF-kappaB cascade (GO:0043122)	regulation of cell migration (GO:0030334)	positive regulation of pathway-restricted SMAD protein phosphorylation (GO:0010862)	negative regulation of programmed cell death (GO:0043069)	regulation of protein catabolic process (GO:0042176)				regulation of cell migration (GO:0030334)
	regulation of NF-kappaB import into nucleus (GO:0042345)	regulation of cell motion (GO:0051270)	regulation of blood vessel size (GO:0050880)	neurological system process (GO:0050877)	regulation of proteolysis (GO:0030162)				regulation of cell motion (GO:0051270)
	regulation of nucleocytoplasmic transport (GO:0046822)	regulation of NF-kappaB import into nucleus (GO:0042345)	regulation of heart contraction (GO:0008016)	ossification (GO:0001503)	regulation of Ras protein signal transduction (GO:0046578)				regulation of DNA replication (GO:0006275)
	regulation of striated muscle contraction (GO:0006942)	second-messenger-mediated signaling (GO:0019932)	regulation of heart rate (GO:0002027)	phosphoinositide-mediated signaling (GO:0048015)	regulation of striated muscle contraction (GO:0006942)				regulation of glycolysis (GO:0006110)
	regulation of striated muscle tissue development (GO:0016202)	skeletal system development (GO:0001501)	regulation of pathway-restricted SMAD protein phosphorylation (GO:0060393)	photoreceptor cell maintenance (GO:0045494)	response to heat (GO:0009408)				regulation of growth (GO:0040008)
	response to calcium ion (GO:0051592)	sulfur metabolic process (GO:0006790)	regulation of protein binding (GO:0043393)	polysaccharide metabolic process (GO:0005976)	skeletal system development (GO:0001501)				regulation of heart contraction (GO:0008016)
	response to heat (GO:0009408)		regulation of striated muscle contraction (GO:0006942)	positive regulation of chemotaxis (GO:0050921)	sphingolipid metabolic process (GO:0006665)				regulation of heart rate (GO:0002027)
	response to metal ion (GO:0010038)		regulation of transforming growth factor beta receptor signaling pathway (GO:0017015)	positive regulation of hydrolase activity (GO:0051345)	transport (GO:0006810)				regulation of MAPKKK cascade (GO:0043408)
	response to wounding (GO:0009611)		sulfur metabolic process (GO:0006790)	positive regulation of leukocyte chemotaxis (GO:0002690)	ventricular cardiac muscle morphogenesis (GO:0055010)				second-messenger-mediated signaling (GO:0019932)
	sodium ion transport (GO:0006814)		ventricular cardiac muscle morphogenesis (GO:0055010)	positive regulation of leukocyte migration (GO:0002687)					skeletal system development (GO:0001501)
	striated muscle contraction (GO:0006941)			protein maturation by peptide bond cleavage (GO:0051605)					striated muscle contraction (GO:0006941)
	sulfur metabolic process (GO:0006790)			regulation of ATPase activity (GO:0043462)					sulfur metabolic process (GO:0006790)
	tissue development (GO:0009888)			regulation of blood vessel size (GO:0050880)					transport (GO:0006810)
	ventricular cardiac muscle morphogenesis (GO:0055010)			regulation of cell differentiation (GO:0045595)
				regulation of erythrocyte differentiation (GO:0045646)
				regulation of heart contraction (GO:0008016)
				regulation of heart rate (GO:0002027)
				regulation of muscle contraction (GO:0006937)
				regulation of RNA splicing (GO:0043484)
				regulation of striated muscle contraction (GO:0006942)
				regulation of striated muscle tissue development (GO:0016202)
				response to calcium ion (GO:0051592)
				second-messenger-mediated signaling (GO:0019932)
				sensory perception (GO:0007600)
				sensory perception of smell (GO:0007608)
				skeletal system development (GO:0001501)
				smooth muscle contraction (GO:0006939)
				sodium ion transport (GO:0006814)
				sulfur metabolic process (GO:0006790)
				transport (GO:0006810)
				ventricular cardiac muscle morphogenesis (GO:0055010)
				visual perception (GO:0007601)

## Sheet: BR - Downregulated Fig.3D
6hpi	1dpi	3dpi	1wpi	2wpi	3wpi	4wpi	5wpi	6wpi	12wpi
axon guidance (GO:0007411)	anatomical structure development (GO:0048856)	activation of plasma proteins involved in acute inflammatory response (GO:0002541)	activation of plasma proteins involved in acute inflammatory response (GO:0002541)	calcium ion transport (GO:0006816)	activation of JUN kinase activity (GO:0007257)	activation of plasma proteins involved in acute inflammatory response (GO:0002541)	aging (GO:0007568)	anatomical structure development (GO:0048856)	activation of phospholipase C activity by G-protein coupled receptor protein signaling pathway coupled to IP3 second messenger (GO:0007200)
calcium ion transport into cytosol (GO:0060402)	anion transport (GO:0006820)	calcium ion homeostasis (GO:0055074)	calcium ion homeostasis (GO:0055074)	carbohydrate metabolic process (GO:0005975)	activation of plasma proteins involved in acute inflammatory response (GO:0002541)	carbohydrate metabolic process (GO:0005975)	cell fate determination (GO:0001709)	anatomical structure morphogenesis (GO:0009653)	anatomical structure morphogenesis (GO:0009653)
carbohydrate metabolic process (GO:0005975)	calcium ion transport (GO:0006816)	calcium ion transport (GO:0006816)	carbohydrate metabolic process (GO:0005975)	cell-matrix adhesion (GO:0007160)	carbohydrate metabolic process (GO:0005975)	cell-substrate adhesion (GO:0031589)	cell recognition (GO:0008037)	brain development (GO:0007420)	calcium ion transport into cytosol (GO:0060402)
cell adhesion (GO:0007155)	cation transport (GO:0006812)	calcium ion transport into cytosol (GO:0060402)	cell-matrix adhesion (GO:0007160)	cell-substrate adhesion (GO:0031589)	cell recognition (GO:0008037)	cellular amine metabolic process (GO:0009308)	cell-substrate adhesion (GO:0031589)	calcium ion homeostasis (GO:0055074)	carbohydrate metabolic process (GO:0005975)
cell growth (GO:0016049)	cell communication (GO:0007154)	carbohydrate metabolic process (GO:0005975)	cell-substrate adhesion (GO:0031589)	cellular amine metabolic process (GO:0009308)	complement activation (GO:0006956)	complement activation (GO:0006956)	cellular amino acid and derivative metabolic process (GO:0006519)	calcium ion transport (GO:0006816)	cell adhesion (GO:0007155)
cell recognition (GO:0008037)	cell fate determination (GO:0001709)	cation transport (GO:0006812)	cellular amine metabolic process (GO:0009308)	cellular amino acid and derivative metabolic process (GO:0006519)	cyclic-nucleotide-mediated signaling (GO:0019935)	detection of abiotic stimulus (GO:0009582)	feeding behavior (GO:0007631)	calcium ion transport into cytosol (GO:0060402)	cell-cell adhesion (GO:0016337)
cell-substrate adhesion (GO:0031589)	cellular amine metabolic process (GO:0009308)	cell adhesion (GO:0007155)	cellular amino acid and derivative metabolic process (GO:0006519)	cellular amino acid derivative metabolic process (GO:0006575)	glycolipid metabolic process (GO:0006664)	detection of light stimulus involved in visual perception (GO:0050908)	growth (GO:0040007)	carbohydrate metabolic process (GO:0005975)	cell-substrate adhesion (GO:0031589)
cellular amine metabolic process (GO:0009308)	cellular amino acid and derivative metabolic process (GO:0006519)	cell fate determination (GO:0001709)	cellular calcium ion homeostasis (GO:0006874)	low-density lipoprotein particle remodeling (GO:0034374)	glycosphingolipid metabolic process (GO:0006687)	detection of stimulus (GO:0051606)	negative regulation of cell differentiation (GO:0045596)	cell communication (GO:0007154)	cytosolic calcium ion transport (GO:0060401)
cellular amino acid and derivative metabolic process (GO:0006519)	cellular amino acid derivative metabolic process (GO:0006575)	cellular amine metabolic process (GO:0009308)	cellular cation homeostasis (GO:0030003)	negative regulation of cell differentiation (GO:0045596)	G-protein coupled receptor protein signaling pathway (GO:0007186)	detection of visible light (GO:0009584)	regulation of RNA splicing (GO:0043484)	cell fate determination (GO:0001709)	hemopoiesis (GO:0030097)
cellular amino acid metabolic process (GO:0006520)	cellular amino acid metabolic process (GO:0006520)	cellular calcium ion homeostasis (GO:0006874)	cellular homeostasis (GO:0019725)	negative regulation of intracellular transport (GO:0032387)	G-protein signaling, coupled to cyclic nucleotide second messenger (GO:0007187)	glycosaminoglycan biosynthetic process (GO:0006024)	regulation of striated muscle tissue development (GO:0016202)	cell surface receptor linked signal transduction (GO:0007166)	homophilic cell adhesion (GO:0007156)
histone deacetylation (GO:0016575)	cellular cation homeostasis (GO:0030003)	cellular cation homeostasis (GO:0030003)	cellular ion homeostasis (GO:0006873)	negative regulation of macrophage differentiation (GO:0045650)	homophilic cell adhesion (GO:0007156)	glycosaminoglycan metabolic process (GO:0030203)		cellular amine metabolic process (GO:0009308)	negative regulation of cell differentiation (GO:0045596)
microtubule-based process (GO:0007017)	cellular homeostasis (GO:0019725)	cellular homeostasis (GO:0019725)	cellular metal ion homeostasis (GO:0006875)	negative regulation of myeloid cell differentiation (GO:0045638)	humoral immune response (GO:0006959)	humoral immune response (GO:0006959)		cellular amino acid and derivative metabolic process (GO:0006519)	negative regulation of protein amino acid phosphorylation (GO:0001933)
negative regulation of cell differentiation (GO:0045596)	cellular ion homeostasis (GO:0006873)	cellular ion homeostasis (GO:0006873)	complement activation (GO:0006956)	negative regulation of transcription factor import into nucleus (GO:0042992)	innate immune response (GO:0045087)	innate immune response (GO:0045087)		cellular amino acid derivative metabolic process (GO:0006575)	nervous system development (GO:0007399)
negative regulation of cellular protein metabolic process (GO:0032269)	circadian rhythm (GO:0007623)	cellular metal ion homeostasis (GO:0006875)	cyclic-nucleotide-mediated signaling (GO:0019935)	negative regulation of transport (GO:0051051)	intracellular signaling cascade (GO:0007242)	kidney development (GO:0001822)		cellular amino acid metabolic process (GO:0006520)	ossification (GO:0001503)
negative regulation of endocytosis (GO:0045806)	cognition (GO:0050890)	complement activation (GO:0006956)	cytosolic calcium ion homeostasis (GO:0051480)	protein complex assembly (GO:0006461)	membrane lipid metabolic process (GO:0006643)	multicellular organismal development (GO:0007275)		cellular calcium ion homeostasis (GO:0006874)	peptide cross-linking (GO:0018149)
negative regulation of macrophage differentiation (GO:0045650)	detection of abiotic stimulus (GO:0009582)	cytosolic calcium ion homeostasis (GO:0051480)	detection of stimulus (GO:0051606)	regulation of cell differentiation (GO:0045595)	negative regulation of cell differentiation (GO:0045596)	negative regulation of cell differentiation (GO:0045596)		cellular cation homeostasis (GO:0030003)	positive regulation of hydrolase activity (GO:0051345)
negative regulation of myeloid cell differentiation (GO:0045638)	detection of light stimulus involved in visual perception (GO:0050908)	cytosolic calcium ion transport (GO:0060401)	elevation of cytosolic calcium ion concentration (GO:0007204)	regulation of erythrocyte differentiation (GO:0045646)	neuropeptide signaling pathway (GO:0007218)	ossification (GO:0001503)		cellular homeostasis (GO:0019725)	protein amino acid glycosylation (GO:0006486)
regulation of striated muscle tissue development (GO:0016202)	detection of stimulus (GO:0051606)	detection of calcium ion (GO:0005513)	feeding behavior (GO:0007631)	regulation of myeloid cell differentiation (GO:0045637)	ossification (GO:0001503)	phototransduction (GO:0007602)		cellular ion homeostasis (GO:0006873)	protein metabolic process (GO:0019538)
vesicle docking during exocytosis (GO:0006904)	detection of visible light (GO:0009584)	detection of chemical stimulus (GO:0009593)	glycosaminoglycan biosynthetic process (GO:0006024)	regulation of nucleocytoplasmic transport (GO:0046822)	phosphorylation (GO:0016310)	polysaccharide metabolic process (GO:0005976)		cellular metal ion homeostasis (GO:0006875)	protein modification process (GO:0006464)
	di-, tri-valent inorganic cation transport (GO:0015674)	di-, tri-valent inorganic cation transport (GO:0015674)	glycosaminoglycan metabolic process (GO:0030203)	regulation of protein catabolic process (GO:0042176)	positive regulation of JUN kinase activity (GO:0043507)	protein amino acid glycosylation (GO:0006486)		cognition (GO:0050890)	receptor-mediated endocytosis (GO:0006898)
	fructose metabolic process (GO:0006000)	elevation of cytosolic calcium ion concentration (GO:0007204)	G-protein coupled receptor protein signaling pathway (GO:0007186)	regulation of proteolysis (GO:0030162)	regulation of MAPKKK cascade (GO:0043408)	regulation of cell differentiation (GO:0045595)		cyclic-nucleotide-mediated signaling (GO:0019935)	regulation of cell differentiation (GO:0045595)
	G-protein coupled receptor protein signaling pathway (GO:0007186)	extracellular matrix organization (GO:0030198)	G-protein signaling, coupled to cyclic nucleotide second messenger (GO:0007187)	regulation of vasoconstriction (GO:0019229)	second-messenger-mediated signaling (GO:0019932)	regulation of protein catabolic process (GO:0042176)		cytosolic calcium ion homeostasis (GO:0051480)	regulation of Ras protein signal transduction (GO:0046578)
	G-protein signaling, coupled to cyclic nucleotide second messenger (GO:0007187)	glycosaminoglycan biosynthetic process (GO:0006024)	homeostatic process (GO:0042592)	skeletal system development (GO:0001501)	sphingolipid metabolic process (GO:0006665)	regulation of proteolysis (GO:0030162)		cytosolic calcium ion transport (GO:0060401)	regulation of vasoconstriction (GO:0019229)
	homeostatic process (GO:0042592)	glycosaminoglycan metabolic process (GO:0030203)	homophilic cell adhesion (GO:0007156)			regulation of RNA splicing (GO:0043484)		detection of abiotic stimulus (GO:0009582)	regulation of vasodilation (GO:0042312)
	icosanoid biosynthetic process (GO:0046456)	glycosphingolipid metabolic process (GO:0006687)	humoral immune response (GO:0006959)			regulation of vasoconstriction (GO:0019229)		detection of light stimulus involved in visual perception (GO:0050908)	telomere maintenance (GO:0000723)
	ion homeostasis (GO:0050801)	homeostatic process (GO:0042592)	innate immune response (GO:0045087)			response to abiotic stimulus (GO:0009628)		detection of stimulus (GO:0051606)
	ion transport (GO:0006811)	ion homeostasis (GO:0050801)	ion homeostasis (GO:0050801)			response to light stimulus (GO:0009416)		detection of visible light (GO:0009584)
	mononuclear cell proliferation (GO:0032943)	ion transport (GO:0006811)	metal ion homeostasis (GO:0055065)			response to radiation (GO:0009314)		di-, tri-valent inorganic cation transport (GO:0015674)
	multicellular organismal metabolic process (GO:0044236)	kidney development (GO:0001822)	negative regulation of cell differentiation (GO:0045596)					elevation of cytosolic calcium ion concentration (GO:0007204)
	negative regulation of cell differentiation (GO:0045596)	metal ion homeostasis (GO:0055065)	ossification (GO:0001503)					fructose metabolic process (GO:0006000)
	negative regulation of DNA replication (GO:0008156)	negative regulation of cell differentiation (GO:0045596)	phosphoinositide-mediated signaling (GO:0048015)					G-protein coupled receptor protein signaling pathway (GO:0007186)
	neurological system process (GO:0050877)	negative regulation of macrophage differentiation (GO:0045650)	phosphorylation (GO:0016310)					G-protein signaling, coupled to cyclic nucleotide second messenger (GO:0007187)
	nucleoside triphosphate catabolic process (GO:0009143)	negative regulation of myeloid cell differentiation (GO:0045638)	polysaccharide metabolic process (GO:0005976)					homeostatic process (GO:0042592)
	nucleotide metabolic process (GO:0009117)	negative regulation of protein amino acid phosphorylation (GO:0001933)	positive regulation of cell migration (GO:0030335)					icosanoid biosynthetic process (GO:0046456)
	phosphoinositide-mediated signaling (GO:0048015)	ossification (GO:0001503)	positive regulation of cell motion (GO:0051272)					ion homeostasis (GO:0050801)
	photoreceptor cell maintenance (GO:0045494)	polysaccharide metabolic process (GO:0005976)	positive regulation of chemotaxis (GO:0050921)					metal ion homeostasis (GO:0055065)
	phototransduction (GO:0007602)	protein amino acid glycosylation (GO:0006486)	positive regulation of leukocyte chemotaxis (GO:0002690)					multicellular organismal metabolic process (GO:0044236)
	prostaglandin metabolic process (GO:0006693)	protein maturation by peptide bond cleavage (GO:0051605)	positive regulation of leukocyte migration (GO:0002687)					negative regulation of cell differentiation (GO:0045596)
	regulation of cell differentiation (GO:0045595)	regulation of RNA splicing (GO:0043484)	regulation of blood coagulation (GO:0030193)					negative regulation of macrophage differentiation (GO:0045650)
	regulation of heart rate (GO:0002027)	regulation of vasoconstriction (GO:0019229)	regulation of cell differentiation (GO:0045595)					negative regulation of myeloid cell differentiation (GO:0045638)
	regulation of membrane potential (GO:0042391)	respiratory gaseous exchange (GO:0007585)	regulation of myeloid cell differentiation (GO:0045637)					negative regulation of phosphorylation (GO:0042326)
	regulation of neurotransmitter levels (GO:0001505)	response to calcium ion (GO:0051592)	second-messenger-mediated signaling (GO:0019932)					nervous system development (GO:0007399)
	regulation of vasoconstriction (GO:0019229)	skeletal system development (GO:0001501)	skeletal system development (GO:0001501)					neurological system process (GO:0050877)
	response to abiotic stimulus (GO:0009628)	telomere maintenance (GO:0000723)	sulfur metabolic process (GO:0006790)					neurotransmitter transport (GO:0006836)
	response to ethanol (GO:0045471)							organ morphogenesis (GO:0009887)
	response to light stimulus (GO:0009416)							phototransduction (GO:0007602)
	response to radiation (GO:0009314)							prostaglandin metabolic process (GO:0006693)
	second-messenger-mediated signaling (GO:0019932)							regulation of blood pressure (GO:0008217)
	sensory perception (GO:0007600)							regulation of neurotransmitter levels (GO:0001505)
	smooth muscle contraction (GO:0006939)							regulation of vasoconstriction (GO:0019229)
	transport (GO:0006810)							response to light stimulus (GO:0009416)
	visual perception (GO:0007601)							response to radiation (GO:0009314)
								second-messenger-mediated signaling (GO:0019932)
								sensory perception (GO:0007600)
								signal transduction (GO:0007165)
								skeletal system development (GO:0001501)
								transport (GO:0006810)
								visual perception (GO:0007601)
								xenobiotic metabolic process (GO:0006805)
